# Supplementary material
Source: PubMed Central journal article supplement (PMC8034558)
Supplement: NIHMS1685757-supplement-Supporting_Information.pdf [file NIHMS1685757-supplement-Supporting_Information.pdf]

## Supporting Information

### **Biodegradable Cationic Polymer Blends for Fabrication of Enhanced Artificial Antigen Presenting Cells to Treat Melanoma**

*Kelly R. Rhodes<sup>1,2,3</sup>, Ariel Isser<sup>1,3,4,5</sup>, John W. Hickey<sup>1,3,4,5</sup>, Elana Ben-Akiva<sup>1,2,3</sup>, Randall A. Meyer<sup>1,2,3</sup>, Alyssa K. Kosmides<sup>1,3,4,5</sup>, Natalie K. Livingston<sup>1,2,3,4,5</sup>, Stephany Y. Tzeng<sup>1,2,3</sup>, Jonathan P. Schneck<sup>3,4,5,6,\*</sup> Jordan J. Green<sup>1,2,3,7,8,9,10,\*</sup>*

<sup>1</sup> Department of Biomedical Engineering, Johns Hopkins University School of Medicine, Baltimore, MD, 21231, USA

<sup>2</sup> Translational Tissue Engineering Center, Johns Hopkins University School of Medicine, Baltimore, MD, 21231, USA

<sup>3</sup> Institute for NanoBioTechnology, Johns Hopkins University School of Medicine, Baltimore, MD, 21231, USA

<sup>4</sup> Institute for Cell Engineering, Johns Hopkins University School of Medicine, Baltimore, MD, 21231, USA

<sup>5</sup> Department of Pathology, Johns Hopkins University School of Medicine, Baltimore, MD, 21231, USA

<sup>6</sup> Department of Medicine, Johns Hopkins University School of Medicine, Baltimore, MD, 21231, USA

<sup>7</sup> Department of Materials Science and Engineering, Johns Hopkins University, Baltimore, MD, 21231, USA

<sup>8</sup> Department of Chemical & Biomolecular Engineering, Johns Hopkins University, Baltimore, MD 21231, USA

<sup>9</sup> Department of Ophthalmology, Johns Hopkins University School of Medicine, Baltimore, MD, 21231, USA

<sup>10</sup> Department of Oncology, Sidney Kimmel Comprehensive Cancer Center and the Bloomberg~Kimmel Institute for Cancer Immunotherapy, Johns Hopkins University School of Medicine, Baltimore, MD, 21231, USA

\* To whom correspondence should be addressed:  
jschnecl@jhmi.edu (J.P. Schneck) and green@jhu.edu (J.J. Green)

**Table S1**

| <b>Backbone: Sidechain<br/>Ratio</b> | <b>Number molecular<br/>weight average<br/>(Mn, Da)</b> | <b>Weight molecular<br/>weight average<br/>(Mw, Da)</b> | <b>Polydispersity Index<br/>(PDI)</b> |
|--------------------------------------|---------------------------------------------------------|---------------------------------------------------------|---------------------------------------|
| 1.05: 1                              | 18322                                                   | 71885                                                   | 3.96                                  |
| 1.1: 1                               | 18813                                                   | 77581                                                   | 4.12                                  |
| 1.2: 1                               | 10693                                                   | 34117                                                   | 3.18                                  |

**Table S1.** Molecular weights and polydispersity of PBAEs synthesized with 1.05, 1.1, or 1.2:1 molar ratios of backbone and sidechain monomers.

**Figure S1**

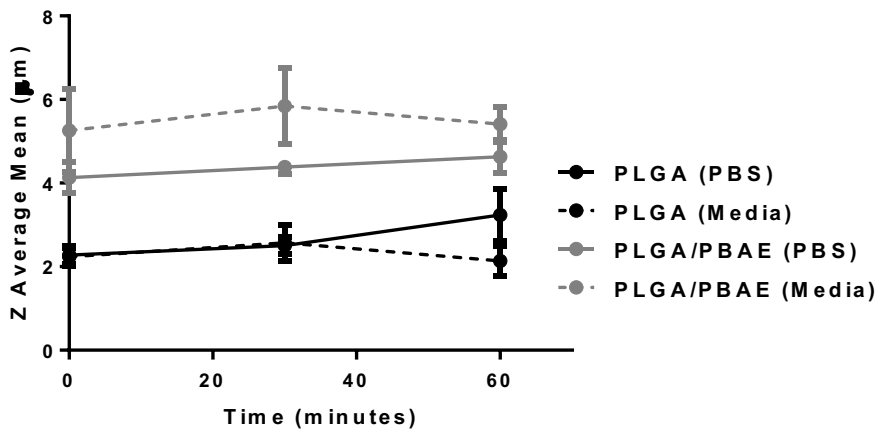

**Figure S1.** Z Average mean of PLGA aAPCs and PLGA/PBAE aAPCs incubated in PBS or media containing 10% serum. PLGA aAPCs and PLGA/PBAE aAPCs were incubated for one hour in PBS or serum-containing media and measured using dynamic light scattering over time. Error bars represent the SEM of three replicates.
